# Supplementary material for: A bimetallic NiFe MOF with ultra-thin two-dimensional nanosheet structure effectively accelerates oxygen evolution reaction
Source: Royal Society of Chemistry journal article supplement (doi:10.1039/d4dt01656d), 2024-01-01
Supplement: d4dt01656d1.pdf [file d4dt01656d1.pdf]

Supporting Information:

**Bimetallic NiFe MOF with ultra-thin two-dimensional  
nanosheet structure effectively accelerates oxygen evolution  
reaction**

Jiaqi He, Xin Deng, Wenting Sun, Wenjing Shang, Yongbing Lou, Jinxi Chen\*

School of Chemistry and Chemical Engineering, Jiangsu Engineering Laboratory of  
Smart Carbon-Rich Materials and Device, Southeast University, Nanjing 211189, PR  
China

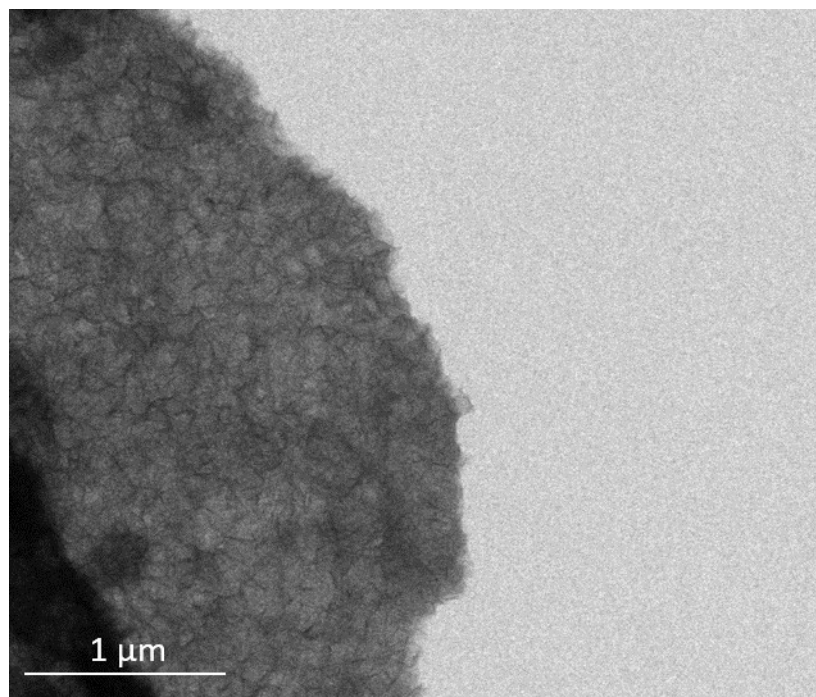

**Figure S1. TEM image of NiFe-NDC.**

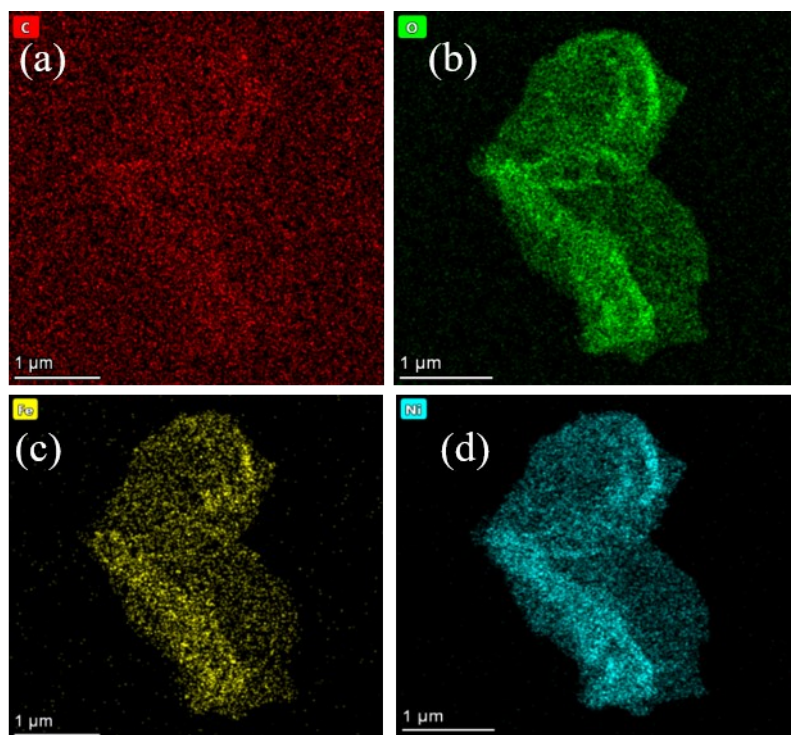

Figure S2. Elemental mapping images of NiFe-NDC.

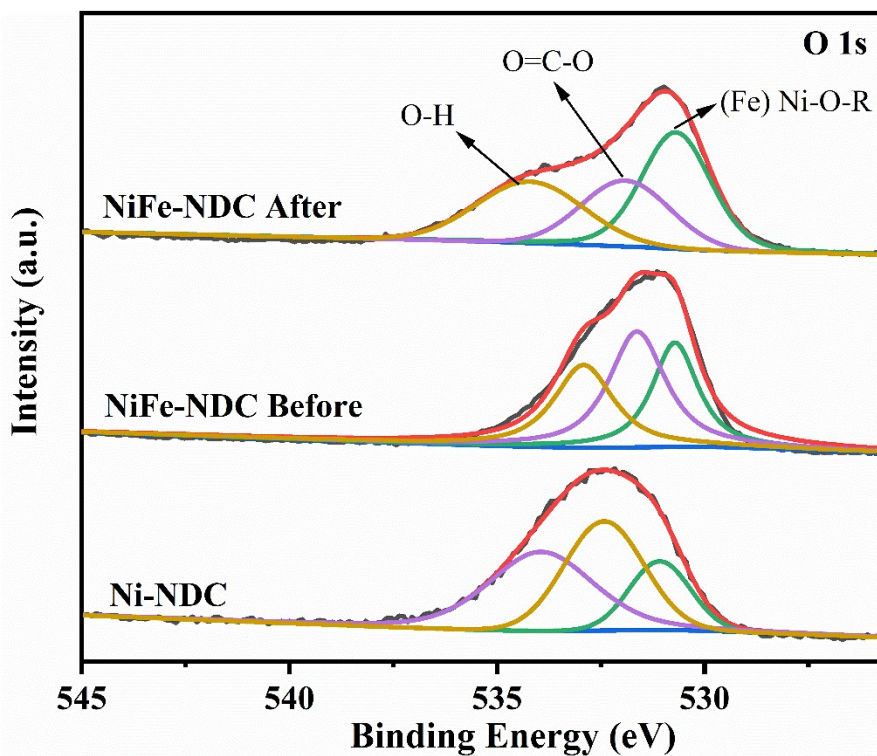

Figure S3. High-resolution XPS spectrums of O 1s for Ni-NDC, NiFe-NDC before and after OER reaction.

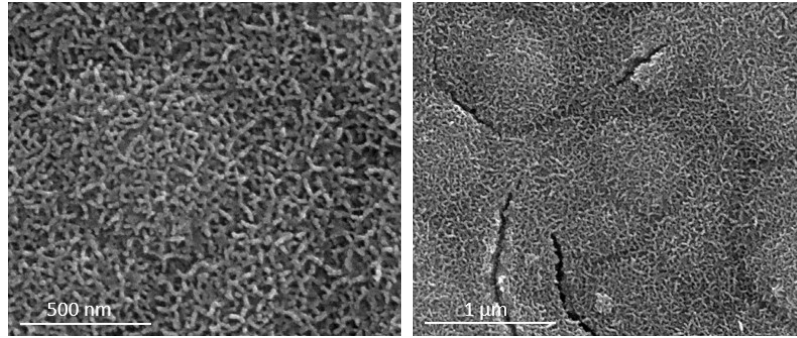

Figure S4. SEM images of NiFe-NDC after 20 h stability test.

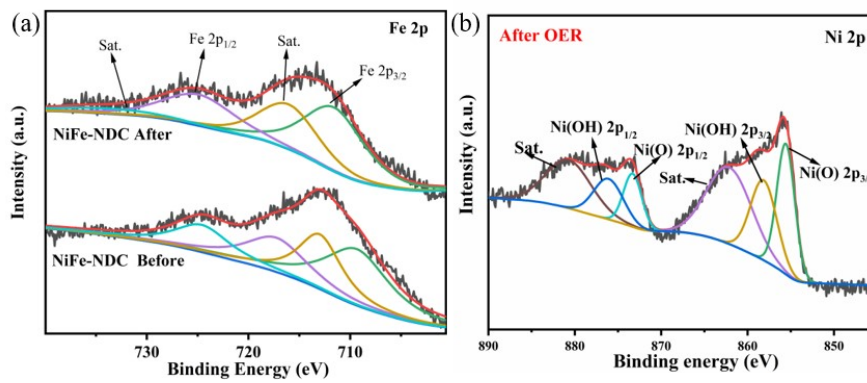

Figure S5. XPS spectra of (a) Fe 2p and (b) Ni 2p of NiFe-NDC after OER.

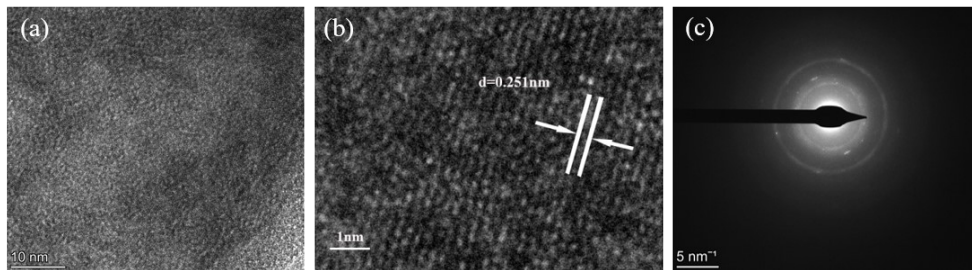

Figure S6. (a) and (b) HRTEM images of NiFe-NDC after OER. (c) SAED pattern.

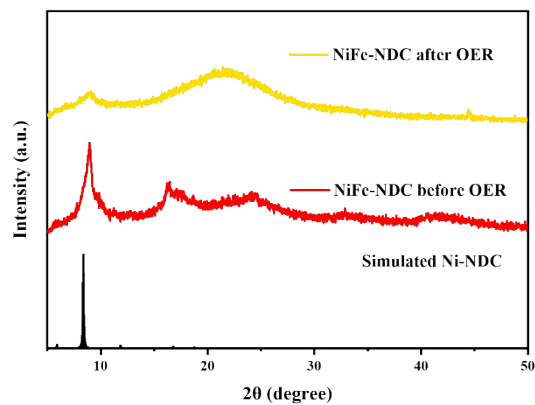

Figure S7. XRD pattern of NiFe-NDC before and after OER.

**Table S1. Comparison of OER catalytic performance of various MOFs**

| Catalyst                                                         | Current Density | Overpotencial | Reference        |
|------------------------------------------------------------------|-----------------|---------------|------------------|
| NiFe-NDC                                                         | 10              | 206           | <b>This work</b> |
| Ru/NiFe(OH) <sub>x</sub> /NiFe-MOF                               | 10              | 242           | 1                |
| NiFe-2D MOF NSs                                                  | 10              | 260           | 2                |
| NiFe-UMNs                                                        | 10              | 260           | 3                |
| MOF-(74 + 274)@NFF                                               | 10              | 198           | 4                |
| NiFe(dobpdc)                                                     | 10              | 207           | 5                |
| FJI-H25FeCo                                                      | 10              | 231           | 6                |
| Fe-Co-Ni MOF                                                     | 10              | 254           | 7                |
| NiFe LDH/MOF                                                     | 10              | 196           | 8                |
| Ni(Fe)-MOF                                                       | 10              | 227           | 9                |
| Ru@FeNi LDH/MOF                                                  | 10              | 242           | 10               |
| MOF-Fe/Co(1:2)                                                   | 10              | 238           | 11               |
| CoFe-LDH/Co-MOF                                                  | 10              | 215           | 12               |
| NiCo/Fe <sub>3</sub> O <sub>4</sub> /MOF-74                      | 10              | 238           | 13               |
| Ni-BDC/NM88B(Fe)                                                 | 10              | 179           | 14               |
| Fe-NiS <sub>2</sub> @NC                                          | 10              | 255           | 15               |
| NiFe-MOF                                                         | 10              | 240           | 16               |
| NFF-MOF                                                          | 10              | 250           | 17               |
| Pt@NiFe-LDH                                                      | 10              | 239           | 18               |
| S/N-CMF@Fe <sub>x</sub> Co <sub>y</sub> Ni <sub>1-x-y</sub> -MOF | 10              | 296           | 19               |
| Fe-Ni-CoOOH-TPA                                                  | 10              | 236           | 20               |

**Table S2. Fe and Ni atomic percentages in ICP-MS.**

| Samples         | Fe / wt% | Ni / wt% |
|-----------------|----------|----------|
| <b>NiFe-NDC</b> | 9.88     | 5.08     |

## Reference

1. D. M. Liu, H. Xu, C. Wang, C. Q. Ye, R. Yu and Y. K. Du, *Journal of Materials Chemistry A*, 2021, 9, 24670-24676.
2. Y. Liu, X. Li, Q. Sun, Z. Wang, W.-H. Huang, X. Guo, Z. Fan, R. Ye, Y. Zhu, C.-C. Chueh, C.-L. Chen and Z. Zhu, *Small*, 2022, 18, 2201076.
3. G. Hai, X. Jia, K. Zhang, X. Liu, Z. Wu and G. Wang, *Nano Energy*, 2018, 44, 345-352.
4. Y. Jiang, T.-Y. Chen, J.-L. Chen, Y. Liu, X. Yuan, J. Yan, Q. Sun, Z. Xu, D. Zhang, X. Wang, C. Meng, X. Guo, L. Ren, L. Liu and R. Y.-Y. Lin, *Advanced Materials*, 2024, 36, 2306910.
5. L. Qi, Y.-Q. Su, Z. Xu, G. Zhang, K. Liu, M. Liu, E. J. M. Hensen and R. Y.-Y. Lin, *Journal of Materials Chemistry A*, 2020, 8, 22974-22982.
6. J. Tian, F. Jiang, D. Yuan, L. Zhang, Q. Chen and M. Hong, *Angewandte Chemie-International Edition*, 2020, 59, 13101-13108.
7. F. S. Farahani, M. S. Rahmanifar, A. Noori, M. F. El-Kady, N. Hassani, M. Neek-Amal, R. B. Kaner and M. F. Mousavi, *Journal of the American Chemical Society*, 2022, 144, 3411-3428.
8. H. Yin, S. Su, D. Yao, L. Wang, X. Liu, T. T. Isimjan, X. Yang and D. Cai, *Inorganic Chemistry Frontiers*, 2024, 11, 2489-2497.
9. C. Cao, D.-D. Ma, Q. Xu, X.-T. Wu and Q.-L. Zhu, *Advanced Functional Materials*, 2019, 29, 1807418.
10. Y. Cao, Y. Wen, Y. Li, M. Cao, B. Li, Q. Shen and W. Gu, *Dalton Transactions*, 2024, 53, 5291-5300.
11. K. Ge, S. Sun, Y. Zhao, K. Yang, S. Wang, Z. Zhang, J. Cao, Y. Yang, Y. Zhang, M. Pan and L. Zhu, *Angewandte Chemie-International Edition*, 2021, 60, 12097-12102.
12. G. Yang, Y. Song, S. Han, Z.-Z. Xue, D.-X. Liu, A. Wang and G. Wang, *Inorganic Chemistry*, 2024, 63, 5634-5641.
13. X. Wang, H. Xiao, A. Li, Z. Li, S. Liu, Q. Zhang, Y. Gong, L. Zheng, Y. Zhu, C. Chen, D. Wang, Q. Peng, L. Gu, X. Han, J. Li and Y. Li, *Journal of the American Chemical Society*, 2018, 140, 15336-15341.
14. Y. Bao, H. Ru, Y. Wang, K. Zhang, R. Yu, Q. Wu, A. Yu, D.-S. Li, C. Sun, W. Li and J. Tu, *Advanced Functional Materials*, 2024, DOI: 10.1002/adfm.202314611.
15. F. Wen, L. Pang, T. Zhang, X. Huang, C. Li and H. Liu, *International Journal of Hydrogen Energy*, 2024, 57, 263-272.
16. J. Duan, S. Chen and C. Zhao, *Nature Communications*, 2017, 8.
17. W. Chen, X. Zhu, Y. Zhang, Y. Zhou and K. K. Ostrikov, *Acs Sustainable Chemistry & Engineering*, 2021, 9, 1826-1836.
18. J.-M. Huo, Z.-L. Ma, Y. Wang, Y.-J. Cao, Y.-C. Jiang, S.-N. Li, Y. Chen, M.-C. Hu and Q.-G. Zhai, *Small*, 2023, 19.
19. Y. Zhao, X. F. Lu, Z.-P. Wu, Z. Pei, D. Luan and X. W. Lou, *Advanced Materials*, 2023, 35, 2207888.

20. H. Chu, R. Li, P. Feng, D. Wang, C. Li, Y. Yu and M. Yang, *Acs Catalysis*, 2024, 14, 1553-1566.
